# Supplementary material for: Field testing of abundance estimation methods for monitoring mammals in tropical mountainous forests: a case study of Simbalbara Wildlife Sanctuary and Churdhar Wildlife Sanctuary, Himachal Pradesh, India
Source: Research Square preprint supplement (doi:10.21203/rs.3.rs-1668246/v1), 2024-03-21

**Field testing of abundance estimation methods for monitoring mammals: a case study of Simbalbara Wildlife Sanctuary and Churdhar Wildlife Sanctuary, Himachal Pradesh, India**

Nidhi Singh1, Urjit Bhatt1, Saurav Chaudhary1, Salvador Lyngdoh1*

1Department of Animal Ecology and Conservation Biology, Wildlife Institute of India, Dehradun, Uttarakhand, India.

*[salvador@wii.gov.in](mailto:salvador@wii.gov.in)

**Supplementary Material**

**Tables**

Table S1.List of mammalian species of (a) SWLS and (b) CWLS, representing RAI2 and RAI3. RAI2 = Trap nights / independent photographs. RAI3 was calculated through frequency distribution of nights to the first detection of photo-captured species.

| Species | SWLS | | CWLS | |
| --- | --- | --- | --- | --- |
| RAI2 | RAI3 | RAI2 | RAI3 |
| Chital *Axis axis* | 4 | 4 |  |  |
| Nilgai *Boselaphus tragocamelus* | 444 | 14 | - | - |
| Golden jackal *Canis aureus* | 887 | 14 | - | - |
| Jungle cat *Felis chaus* | - | - | 1804 | 10 |
| Indian crested porcupine *Hystrix indica* | 6 | 1 | 21 | 4 |
| Rhesus macaque *Macaca mulatta* | 4 | 1 | 27 | 36 |
| Yellow-throated marten *Martes flavigula* | - | - | 45 | 9 |
| Barking deer *Muntiacus muntjac* | 7 | 1 | 95 | 5 |
| Himalayan brown goral *Nemorhaedus goral* | 99 | 25 | 1804 | 36 |
| Masked palm civet *Paguma larvata* | 55 | 4 | 601 | 11 |
| Leopard *Panthera pardus* | 59 | 5 | 41 | 6 |
| Asitic palm civet *Paradoxurus hermaphroditus* | 177 | 10 | - | - |
| Leopard cat *Prionailurus bengalensis* | 111 | 4 | 18 | 4 |
| Sambar *Rusa unicolor* | 1 | 3 | - | - |
| Himalayan langur *Semnopithecus schistaceus* | 12 | 9 | 18 | 12 |
| Wild boar *Sus scrofa* | 3 | 2 | - | - |
| Asiatic black bear *Ursus thibetanus* | - | - | 56 | 7 |
| Small Indian civet *Viverricula indica* | 444 | 12 | - | - |
| Red fox *Vulpes vulpes* | - | - | 7 | 1 |

Table S2.A table representing the models and functions used for calibration of density by CTDS method for SWLS.

| Species | CV | 95% CI | Function |
| --- | --- | --- | --- |
| Spotted Deer *Axis axis* | 0.34 | 2.35-9.42 | Half-normal / Hermite |
| Sambar *Rusa unicolor* | 0.18 | 3.65-7.96 | Uniform / Cosine |
| Barking Deer *Muntiacus muntjac* | 0.29 | 1.97-6.32 | Half-normal / Hermite |
| Wild Pig *Sus scrofa* | 0.36 | 0.96-4.77 | Half-normal / Hermite |
| Rhesus Macaque *Macaca mulatta* | 0.47 | 0.48-3.51 | Uniform / Cosine |
| Himalayan Langur *Semnopithecus schistaceus* | 0.48 | 0.47-3.12 | Half-normal / Hermite |

Table S3.A table representing the models and functions used for calibration of density by CTDS method for CWLS.

| Species | CV | 95% CI | Function |
| --- | --- | --- | --- |
| Asiatic Black bear *Ursus thibetanus* | 0.48 | 0.16-1.48 | Uniform / Cosine |
| Red fox *Vulpes vulpes* | 0.34 | 0.77-3.32 | Uniform / Cosine |
| Yellow throated marten *Martes flavigula* | 0.34 | 0.88-3.54 | Uniform / Cosine |
| Barking Deer *Muntiacus muntjac* | 0.44 | 0.47-13.46 | Uniform / Cosine |
| Indian crested porcupine *Hystrix indica* | 0.38 | 0.64-2.90 | Half-normal / hermite |
| Himalayan Langur *Semnopithecus schistaceus* | 0.4 | 1.69-8.89 | Half-normal / hermite |

Table S4. Densities of ungulate species in Simbalbara Wildlife Sanctuary, estimated via field calibration through CTDS method with θ=42° (0.733 radians), and analysis using point transect method in ‘distance’ software with varying grid sizes.

| Species | Density CTDS (individual / km2) | CV | 95% CI | Function |
| --- | --- | --- | --- | --- |
| (a). Grid size: 1.5 km2 | | | | |
| Spotted Deer  *Axis axis* | 0.6 ± SE 0.3 | 0.58 | 0.21-1.95 | Half-normal / hermite |
| Sambar  *Rusa unicolor* | 4.3 ± SE 1.3 | 0.31 | 2.35-8.18 | Hazard-rate / hermite |
| Barking Deer *Muntiacus muntjac* | 0.2 ± SE 0.1 | 0.49 | 0.09-0.61 | Half-normal / hermite |
| Wild Pig  *Sus scrofa* | 0.5 ± SE 0.2 | 0.39 | 0.24-1.13 | Half-normal / hermite |
| (b). Grid size: 2 km2 | | | | |
| Spotted Deer  *Axis axis* | 0.5 ± SE 0.3 | 0.65 | 0.15-1.81 | Half-normal / hermite |
| Sambar  *Rusa unicolor* | 3.2 ± SE 1.1 | 0.35 | 1.64-6.56 | Hazard-rate / hermite |
| Barking Deer *Muntiacus muntjac* | 0.2 ± SE 0.1 | 0.52 | 0.07-0.57 | Half-normal / hermite |
| Wild Pig  *Sus scrofa* | 0.3 ± SE 0.1 | 0.49 | 0.13-0.88 | Half-normal / hermite |

**Figures**


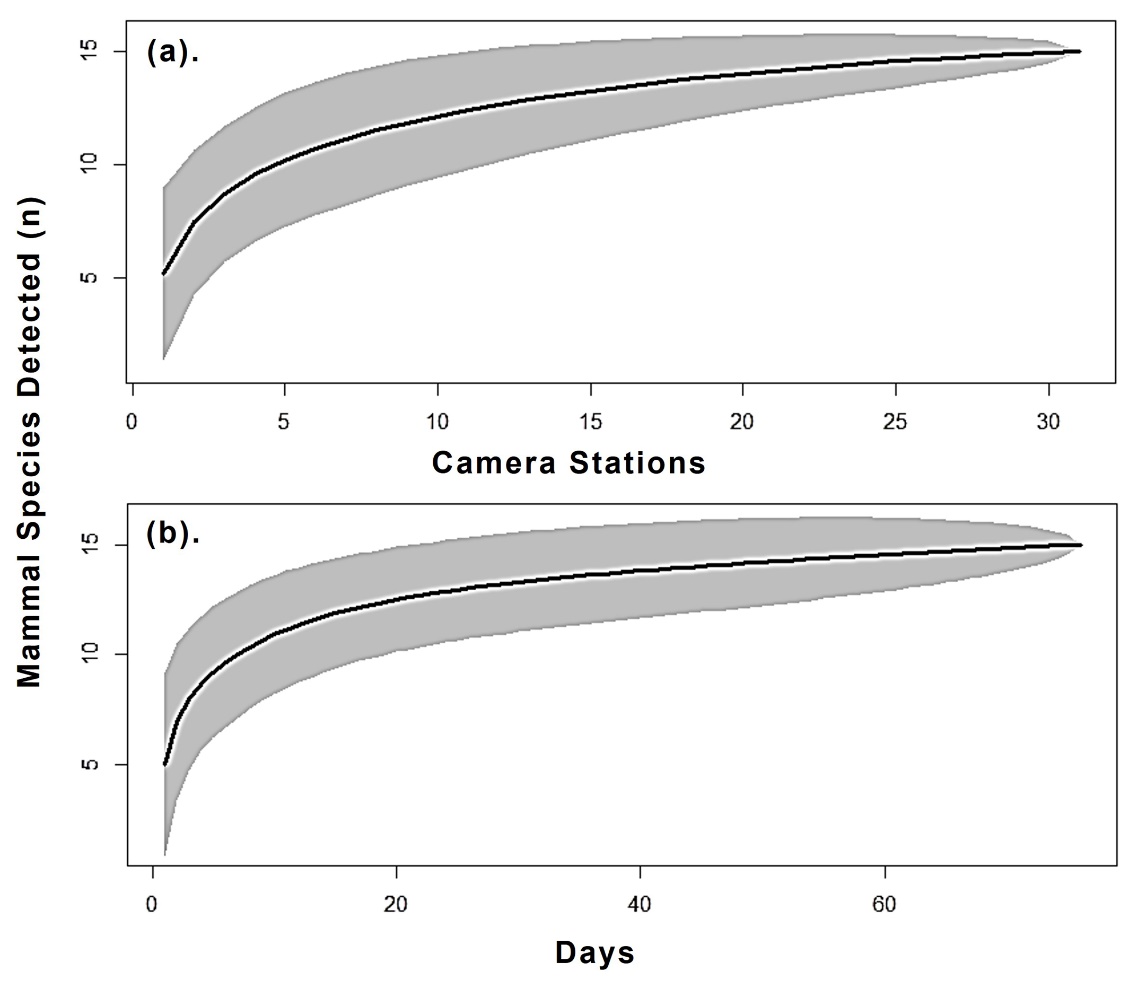
Figure S1.Species accumulation curve for mammals estimated, depicting the relationship to the number of mammal species (n=15) detected over (a). 31 camera stations and (b). 76 days, in SWLS. The black line indicates the modelled species accumulation curve, and the shaded area indicates 95 % confidence interval.


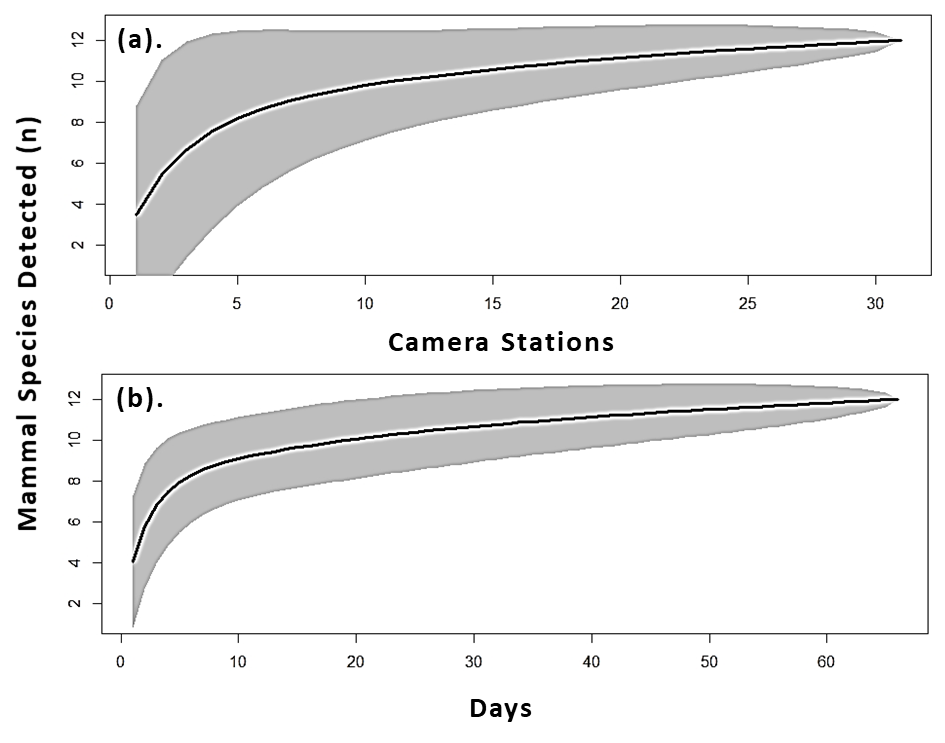
Figure S2.Species accumulation curve for mammals estimated, depicting the relationship to the number of mammal species (n=15) detected over (a). 31 camera stations and (b). 67 days, in CWLS. The black line indicates the modelled species accumulation curve, and the shaded area indicates 95 % confidence interval.


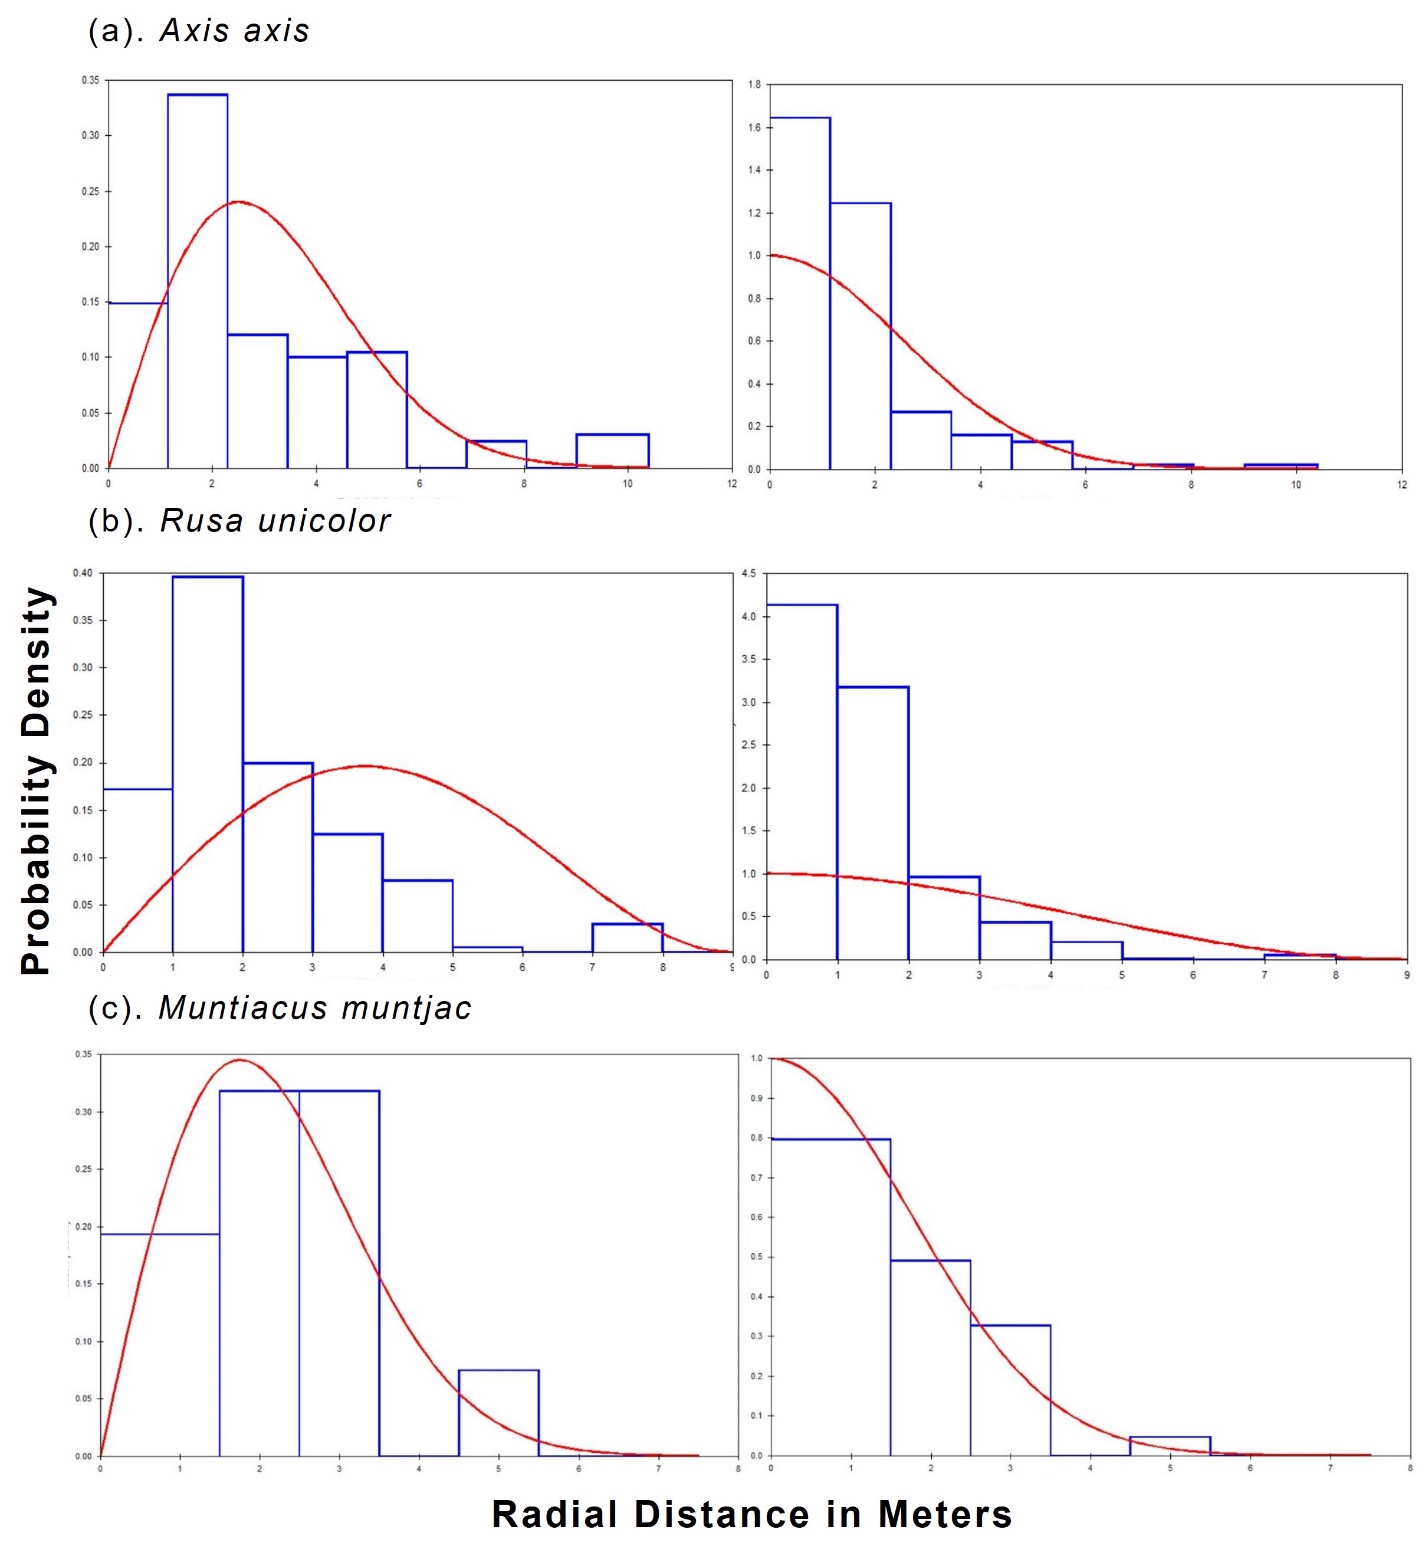
Figure S3. The detection probability and probability density for the models selected for estimating density by CTDS method for SWLS. The bars show the data distribution, and the line represents the model fit. The heights of the bars are scaled so that they cover the same total area as the area under the line, to show how well the detection function fits the data.


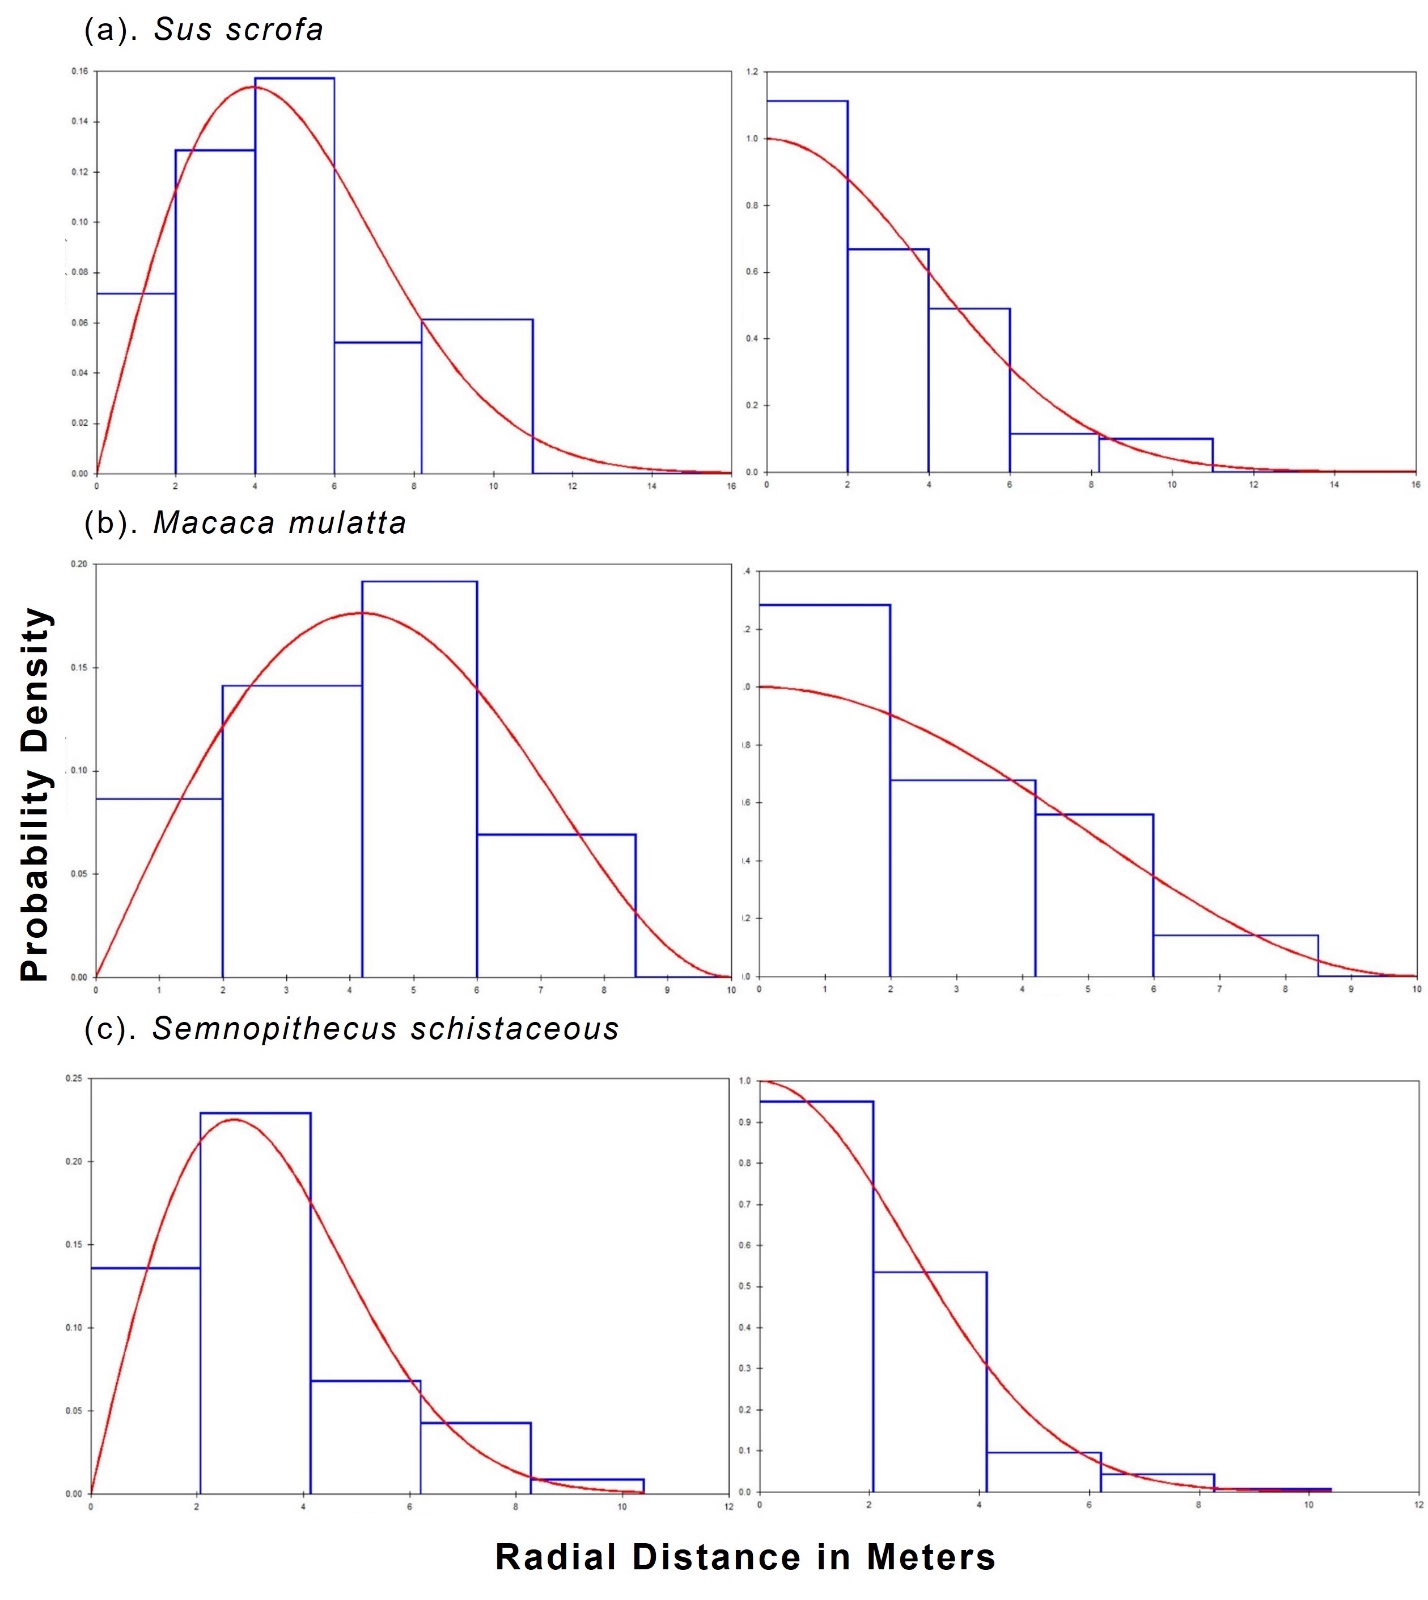
Figure S4. The detection probability and probability density for the models selected for estimating density by CTDS method for SWLS. The bars show the data distribution, and the line represents the model fit. The heights of the bars are scaled so that they cover the same total area as the area under the line, to show how well the detection function fits the data.


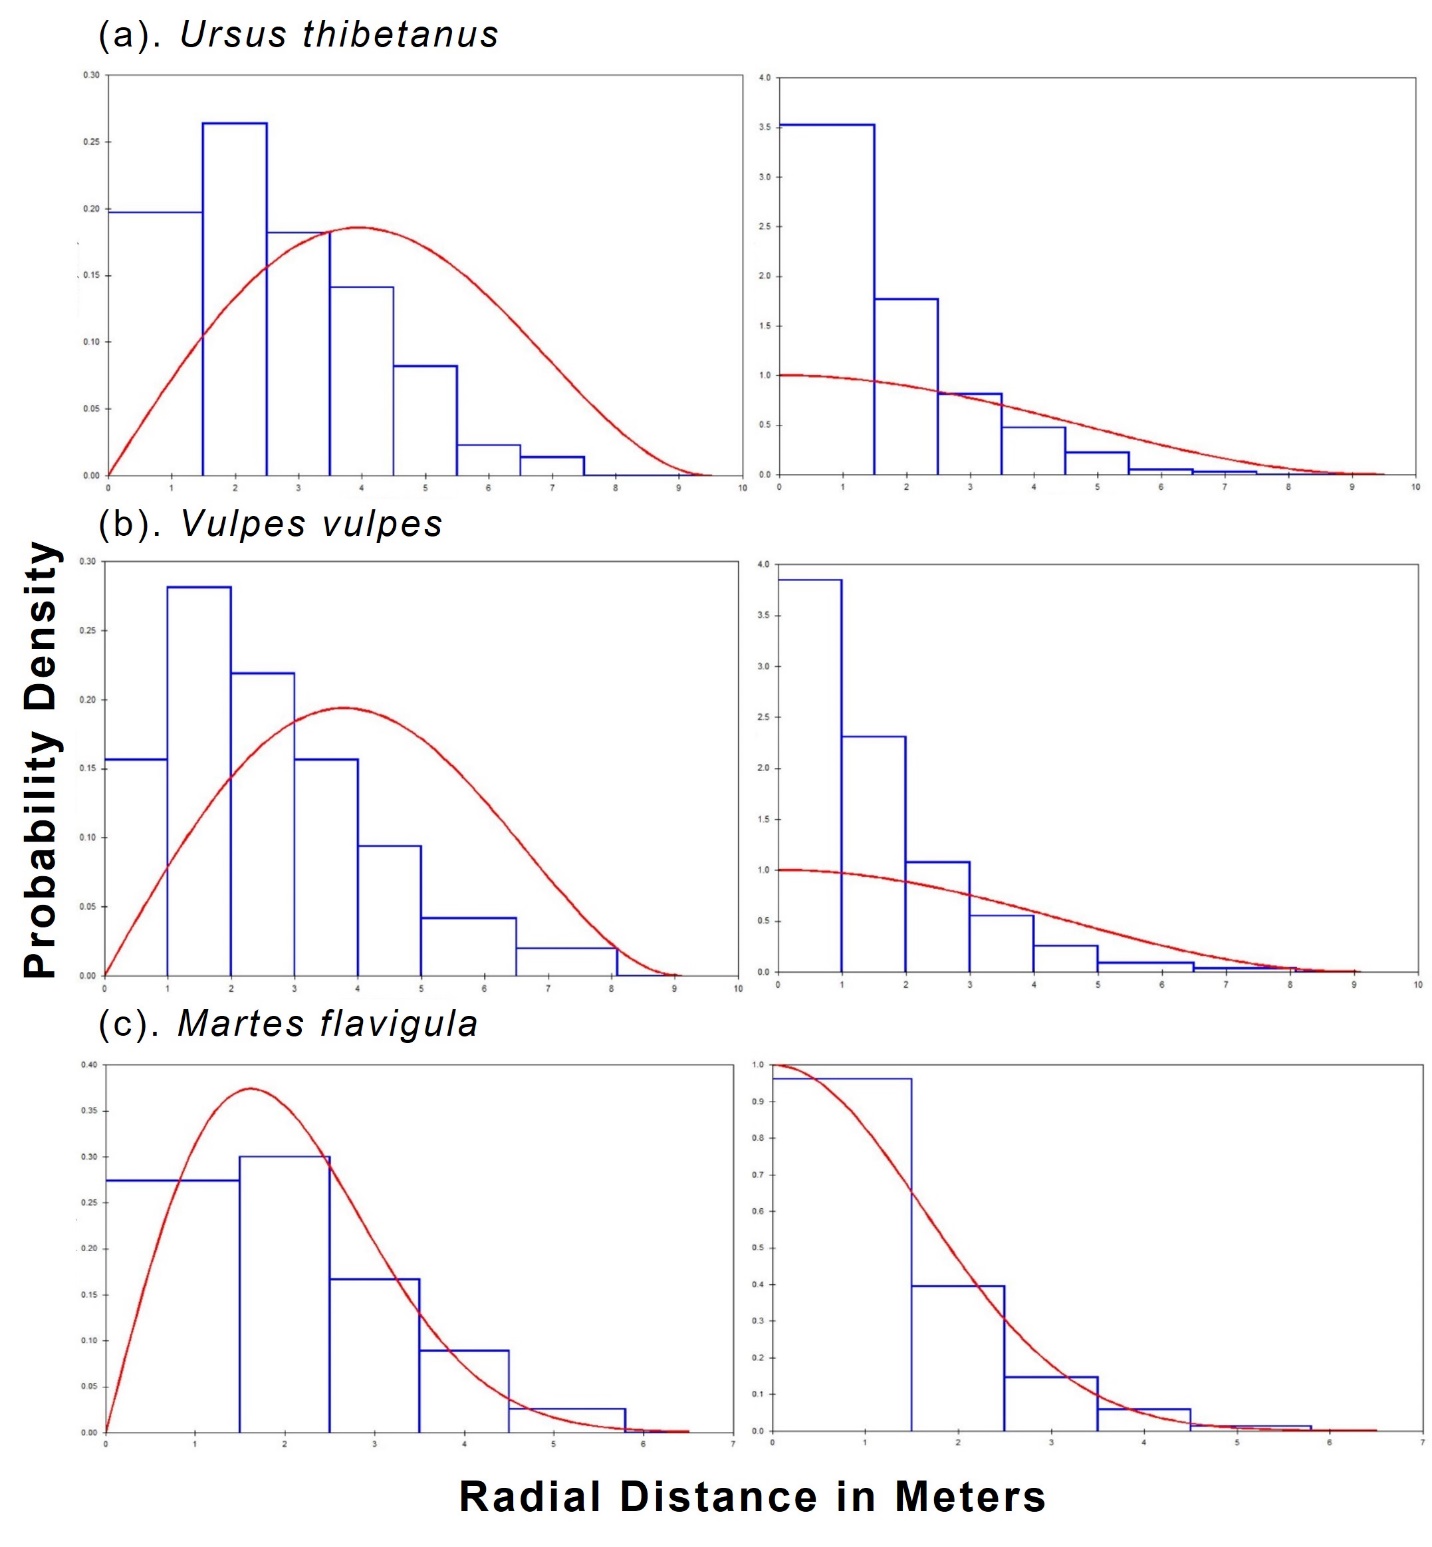
Figure S5. The detection probability and probability density for the models selected for estimating density by CTDS method for CWLS. The bars show the data distribution, and the line represents the model fit. The heights of the bars are scaled so that they cover the same total area as the area under the line, to show how well the detection function fits the data.


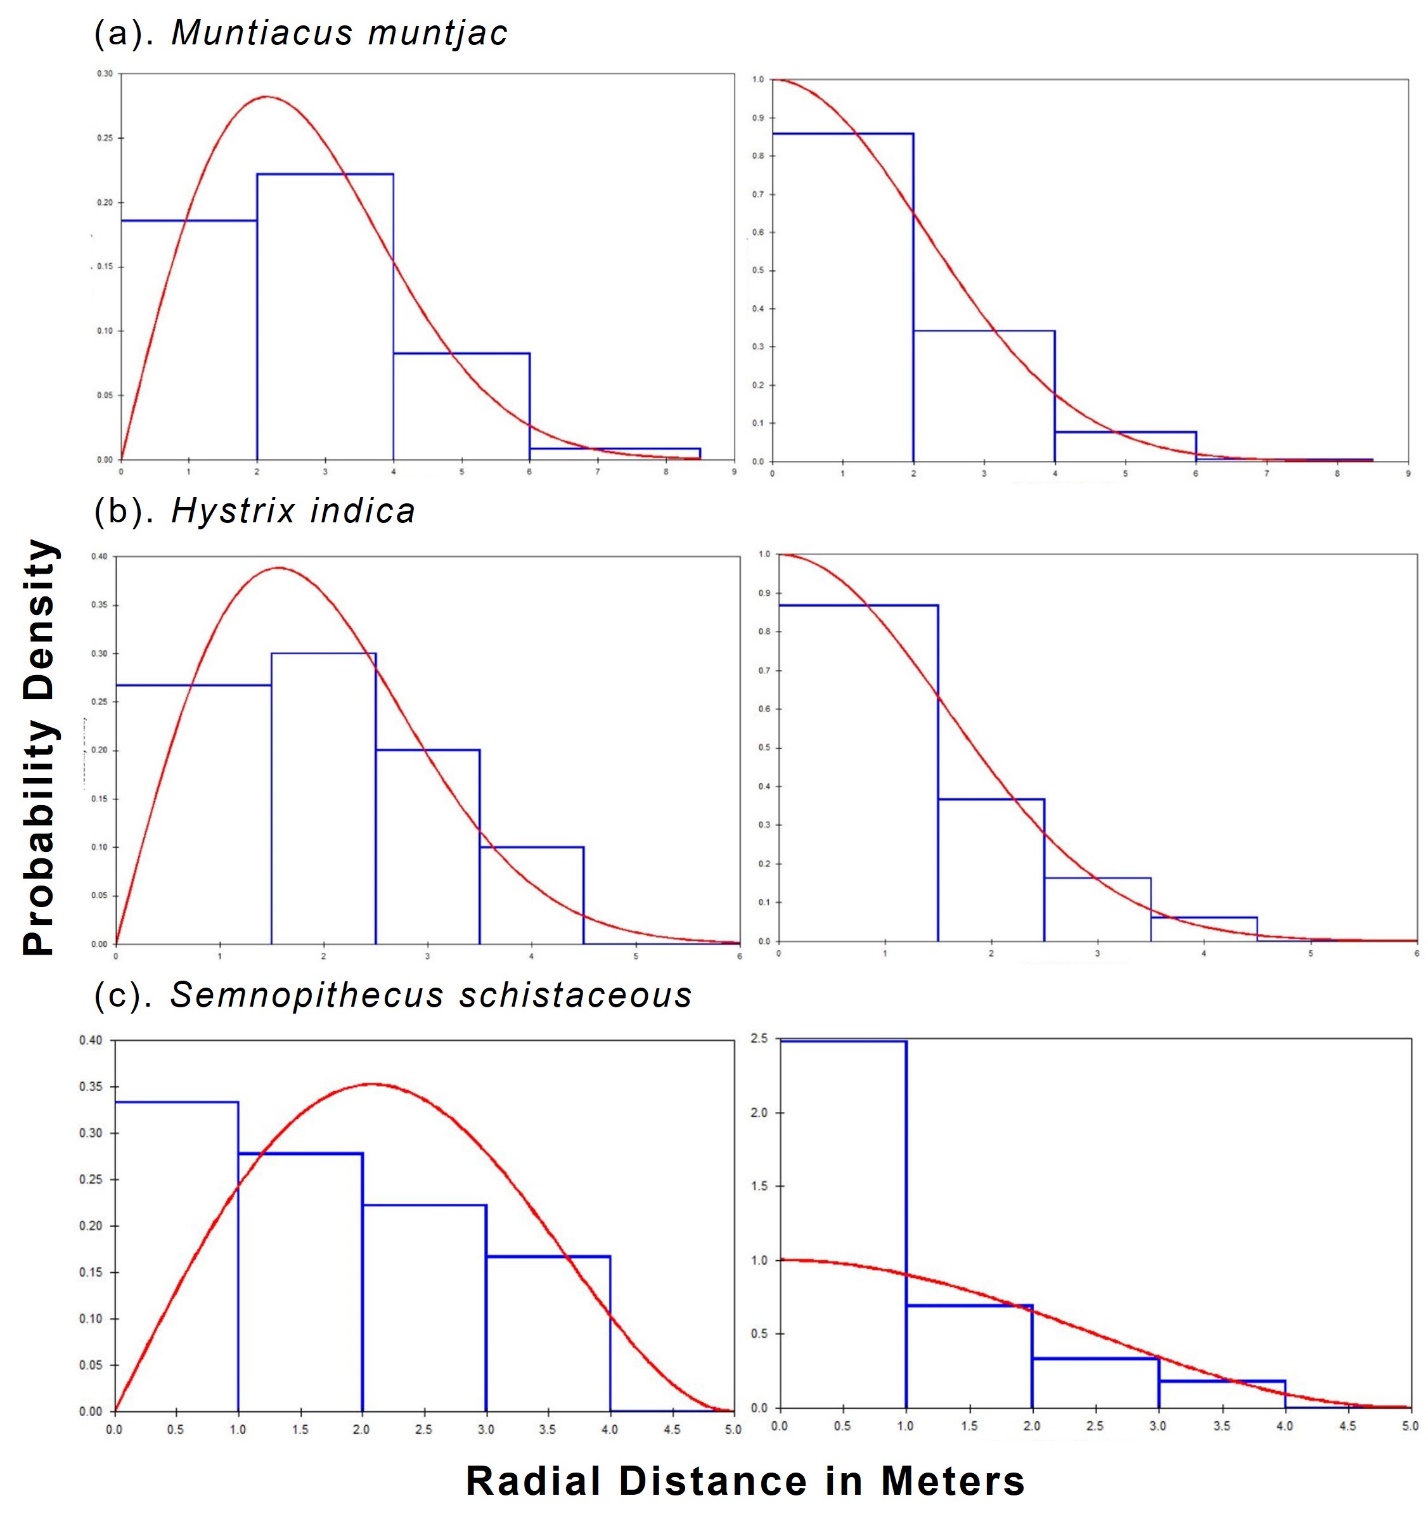
Figure S6. The detection probability and probability density for the models selected for estimating density by CTDS method for CWLS. The bars show the data distribution, and the line represents the model fit. The heights of the bars are scaled so that they cover the same total area as the area under the line, to show how well the detection function fits the data.

Figure S7. The detection probability for the models selected for estimating density by LTDS method for SWLS. The bars show the data distribution, and the line represents the model fit. The heights of the bars are scaled so that they cover the same total area as the area under the line, to show how well the detection function fits the data.


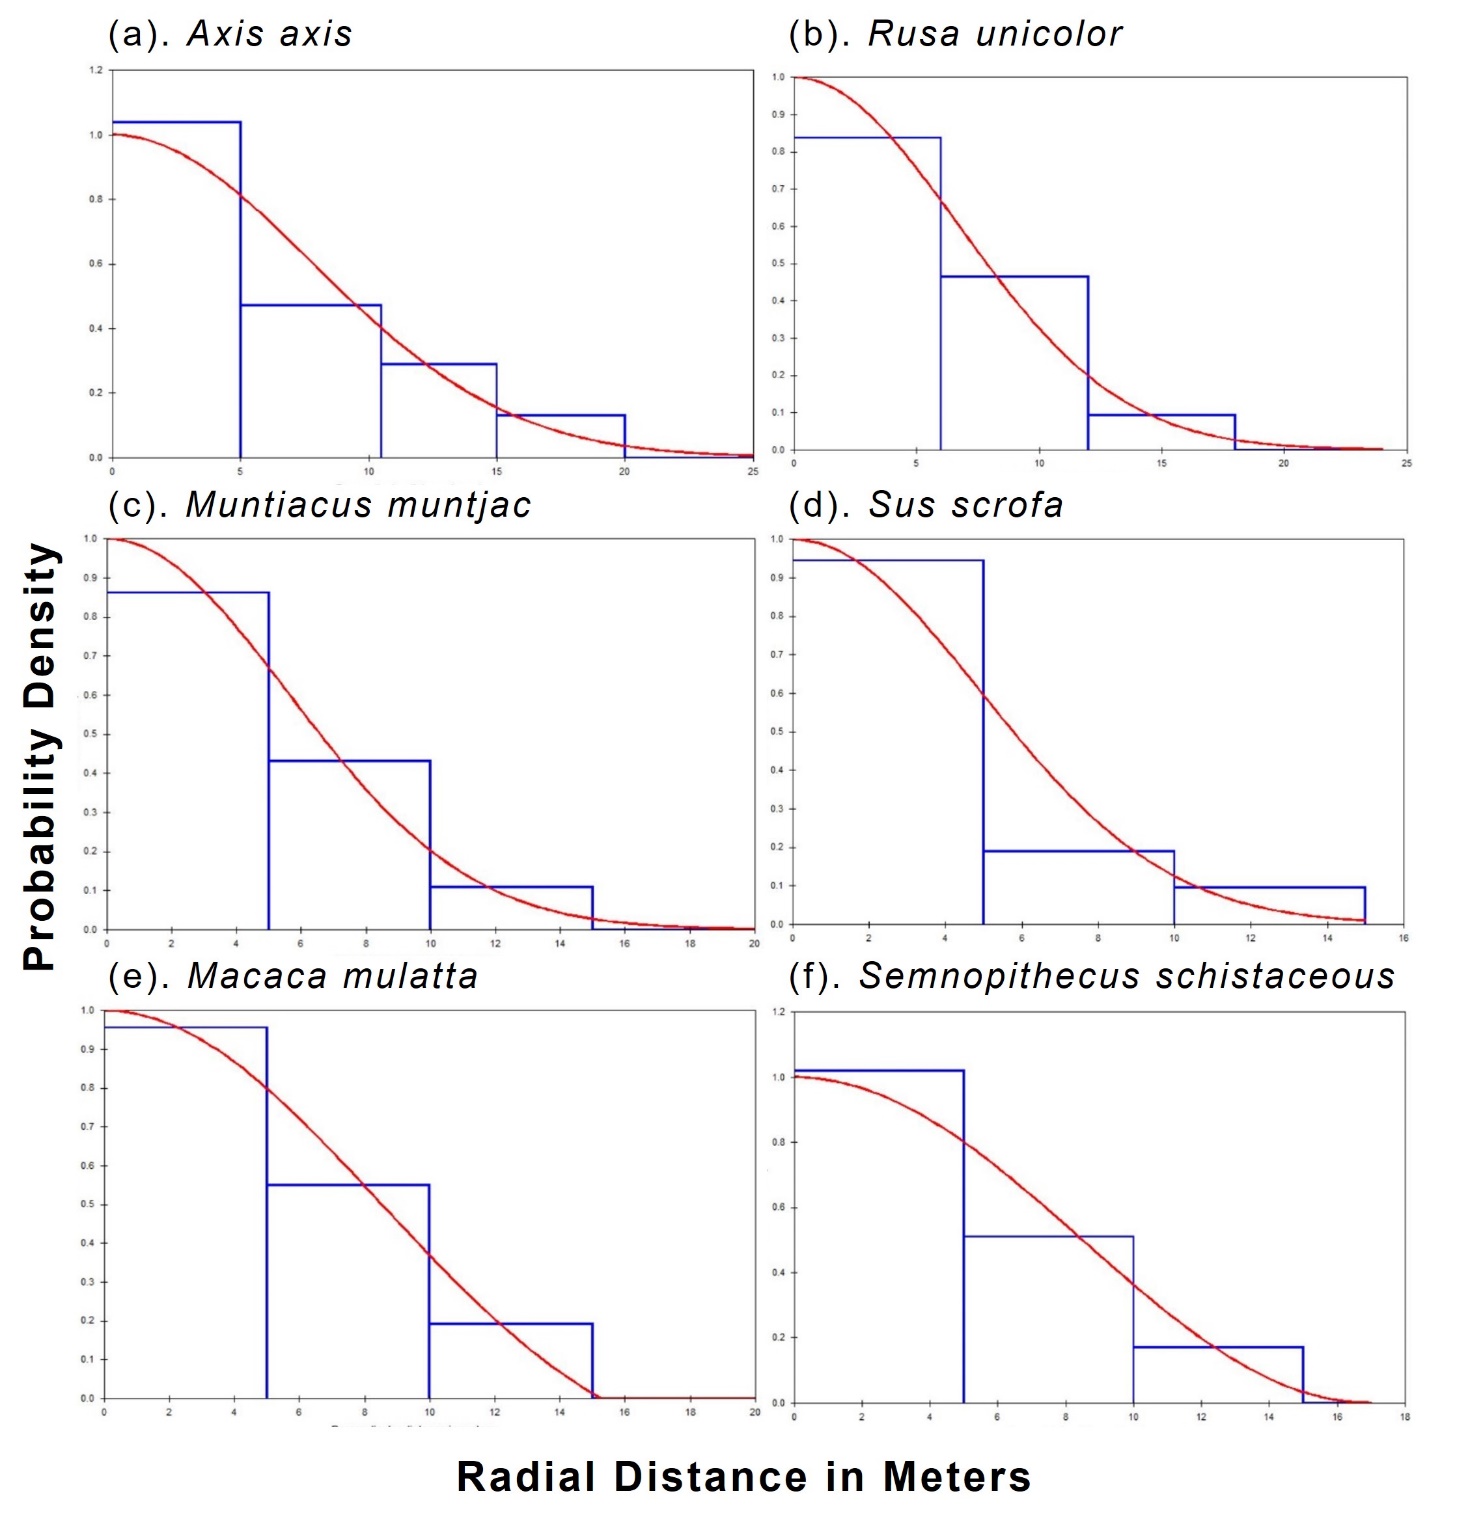


Figure S8. The bar graph compares densities estimated for mammalian species using the CTDS method in CWLS.


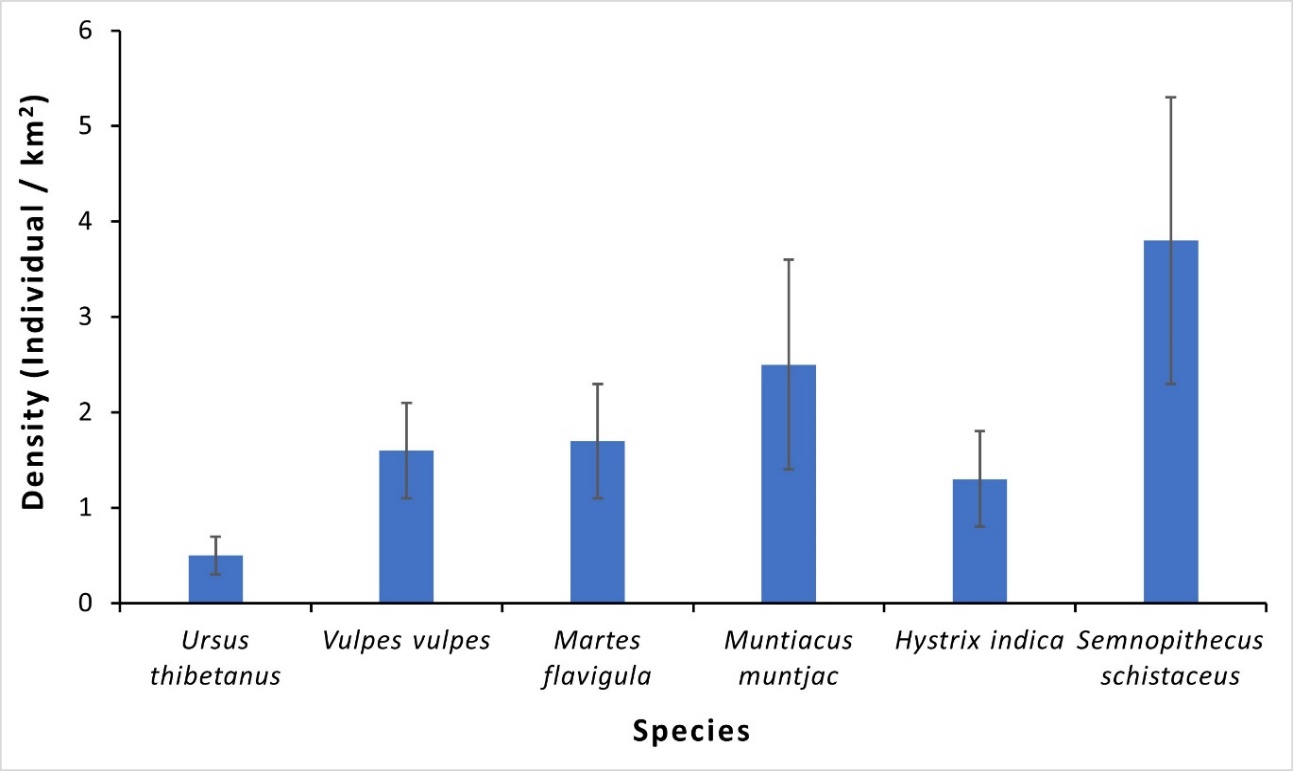

Supplement: Supplementary file 1 [file 0bced8c93ae213becc518229.docx]
